**Forelimb muscle architecture and myosin isoform composition in the  
groundhog (*Marmota monax*)**

J. E. Rupert<sup>1,2</sup>, J. A. Rose<sup>1</sup>, J. M. Organ<sup>2</sup>, \*M. T. Butcher<sup>1</sup>

<sup>1</sup>*Department of Biological Sciences, Youngstown State University, Youngstown, OH USA*

<sup>2</sup>*Department of Anatomy and Cell Biology, Indiana University School of Medicine, Indianapolis,  
IN USA*

Word Count: 4834 (intro-discussion)

Text Pages: 21

5 Tables; 6 Figures

**\*Corresponding author:**

Michael T. Butcher

Department of Biological Sciences

4037 Ward Beecher Hall

Youngstown State University

Youngstown, OH 44555, USA

Email: (mtbutcher@ysu.edu)

Phone: 330-941-2195

## ABSTRACT

Scratch-digging mammals are commonly described as having large, powerful forelimb muscles for applying high force to excavate earth, yet studies quantifying the architectural properties of the musculature are largely unavailable. To further test hypotheses about traits that represent specializations for scratch-digging, we quantified muscle architectural properties and fiber type in the forelimb of the groundhog (*Marmota monax*), a digger that constructs semi-complex burrows. Architectural properties measured were muscle moment arm, muscle mass (MM), belly length (ML), fascicle length ( $l^F$ ), pennation angle, and physiological cross-sectional area (PCSA), and these metrics were used to estimate maximum isometric force, joint torque, and power. Myosin heavy chain (MHC) isoform composition was determined in selected forelimb muscles by SDS-PAGE and densitometry analysis. Groundhogs have large limb retractors and elbow extensors that are capable of applying moderately high torque at the shoulder and elbow joints, respectively. Most of these muscles (e.g., latissimus dorsi and pectoralis superficialis) have high  $l^F/ML$  ratios, indicating substantial shortening ability and moderate power. The unipennate triceps brachii long head has the largest PCSA and is capable of the highest joint torque at both the shoulder and elbow joints. The carpal and digital flexors show greater pennation and shorter fascicle lengths than the limb retractors and elbow extensors, resulting in higher PCSA:MM ratios and force production capacity. Moreover, the digital flexors have the capacity for both appreciable fascicle shortening and force production indicating high muscle work potential. Overall, the forelimb musculature of the groundhog is capable of relatively low sustained force and power, and these properties are consistent with the findings of a predominant expression of the MHC-2A isoform. Aside from the apparent modifications to the digital flexors, the collective muscle properties observed are consistent with its behavioral classification as a less specialized burrower and these may be more representative of traits common to numerous rodents with burrowing habits or mammals with some fossorial ability.

**Keywords: force, muscle, myosin, power, scratch-digging**

## INTRODUCTION

Morphological evaluations of scratch-digging mammals often describe large and powerful forelimb muscles and skeletal modifications for increased mechanical advantage for the excavation of earth; however, few studies attempt to quantify the architectural properties of the musculature (e.g., Lehmann, 1963; Gambaryan, 1974; Gambaryan and Gasc, 1993; Lagaria and Youlatos, 2006; Endo et al., 2007). The force and power that a whole muscle can apply at a limb joint are strongly influenced by the arrangement of the muscle fibers relative to the axis of force production within the muscle (Eng et al., 2008; Lieber, 2009). Pennate muscles with short fibers have larger physiological cross-sectional area (PCSA), and thus the ability to produce high isometric force (Alexander, 1981, 1984). Alternatively, muscles with long fibers arranged in parallel with the axis of force production have a greater ability to shorten and produce force over a large range of joint motion (Peters and Rick, 1977; Zajac, 1989, 1992). A trade-off between these two functional designs indicates that a muscle is capable of performing appreciable mechanical work at high power. To begin identifying traits that represent muscle specializations for scratch-digging, we recently quantified muscle architectural properties in the forelimb of the semi-fossorial American badger and identified the following key modifications: massive humeral retractors, elbow extensors, and digital/carpal flexors; two heads of the triceps brachii are biarticular and capable of applying large torque at the shoulder (flexor moment) and elbow (extensor moment) joints; and digital flexors that are pennate and compartmentalized for both high force production and fascicle shortening (Moore et al., 2013).

At the cellular level, the myosin heavy chain (MHC) isoforms expressed within a muscle fiber directly determine fiber isometric tension, unloaded shortening velocity, and power (Reiser et al., 1985; Schiaffino and Reggiani, 1996, 2011). Fast MHC-2X and 2B fibers are more glycolytic in their ATPase metabolism and have much higher power output than fast MHC-2A fibers, which are highly oxidative, and generate more power than slow, oxidative MHC-1 fibers. Similar to muscle architectural properties, few studies have evaluated muscle fiber type in the forelimbs of scratch-diggers. Goldstein (1971) reported that the triceps brachii and teres major of generalized ground squirrels (*Spermophilus*) and chipmunks (*Neotamias*) consist of three ‘fiber types,’ but were composed of predominately ‘slow-contracting’ fibers based solely on the presence or absence of stored glycogen in the muscles. Using similar histochemical approaches, Alvarez et al. (2012) found that the same muscles in fossorial tuco-tucos (*Ctenomys*) also contain three fiber

types and have a majority of fast, oxidative/glycolytic (FOG) fibers as classified by their myosin ATPase reactions. These findings suggest that overall, more oxidative fiber types are required for sustained burrowing activity in rodents, yet comparison of function with homologous muscles from other scratch-diggers is limited because the MHC isoform of the fiber types are unknown. Moreover, it is not clear if less heterogeneity in MHC expression represents specialization for variation in muscle force and power between generalized burrowing and fossorial mammals.

The groundhog (or woodchuck) is a terrestrial scratch-digger that belongs to the family Sciuridae (Steppan et al., 2004) and ranges throughout North America by having the flexibility to inhabit numerous ecosystems (Swihart, 1992). It is one of 14 species of marmots (Steppan et al., 1999), all of which are herbivorous, and have the largest body sizes of any of the sciurids. Adult body mass ranges from 2.7–5.4 kg (Bezuidenhout and Evans, 2005), with an average dimorphic body mass of 3.8 kg for males and 3.5 kg for females (Snyder et al., 1961). Body mass varies with hibernation behavior, with the peak body mass occurring immediately prior to hibernation (~7 months/year). Groundhogs excavate their own burrows in open pastures and at the edges of forests, and they are primarily used for protection, hibernation, and the rearing of kits (Meier, 1992). Burrows may be simple, having no defined structure, or more complex, containing several chambers or dens (Kwiecinski, 1998), and they can be up to 2 m deep and 1–13 m long (Hamilton, 1934). In addition to burrowing, groundhogs have a locomotor repertoire that includes slow walking and running in short intervals, swimming, and climbing to potentially escape predators (Hamilton, 1934).

Groundhogs have morphological features more typical of a generalized burrower (Hildebrand, 1985; Kley and Kearney, 2007) including: a reduced nictitating membrane (covers only the medial corners of the cornea); relatively large, shovel-shaped hindfeet that lack webbing between the digits (Bezuidenhout and Evans, 2005); and muscular forelimbs with forefeet that have only four short (~1.5 cm) claws. Although their forelimb osteology [i.e., mechanical advantage (Lagaria and Youlatos, 2006)] and myology (Bezuidenhout and Evans, 2005) have been described in detail, the architectural properties of their forelimb muscles have not been quantified and related to their digging habits. The aims of this study are 1. to quantify muscle fiber architecture and MHC isoform composition in groundhogs, and 2. to estimate peak isometric force ( $F_{\max}$ ), joint torque, and instantaneous power (W) of the forelimb musculature. Reflective of their relatively generalized lifestyle, we hypothesize that the forelimb muscles of groundhogs

will have the capacity to apply only moderate torque and power at the shoulder, elbow, and carpal joints, and they will be heterogeneous in their MHC isoform content. Specifically, we expect the limb retractors and elbow extensors to have long, parallel fibers and be considerably more massive than the carpal/digital flexors, which will have shorter fibers, and varying degrees of pennation (and PCSA) that may enhance the application of force at the manus. These functional muscle groups are also expected to have unequal proportions of MHC-1, 2A, and 2X, with a predominance of the isoforms 1 and 2A corresponding with both their phylogenetic and functional similarity to ground squirrels and chipmunks. The data obtained serve to clarify the relationship between internal muscle properties and fossorial ability, and further distinguish muscle traits that indicate muscle specializations for scratch-digging among mammals.

## RESULTS

### Functional distribution of forelimb muscle mass

The digging apparatus of the forelimb has 44 muscles (excluding muscles intrinsic to the manus) for which muscle architecture is quantified (Tables 1, 2). Mean total forelimb muscle mass is  $164.9 \pm 30.1$  g, accounting for 3.3% of body mass (i.e., per single limb). Overall, the limb retractors and elbow extensors are the two most massive functional muscle groups of the digging apparatus. Of these muscle groups, the latissimus dorsi and pectoralis superficialis are the two largest muscles of the forelimb, and together they account for 10.6% of total forelimb muscle mass. The triceps brachii long head (TBLO) is also large, and combined with the lateral and medial/accessory heads, the triceps brachii accounts for 5.2% of total forelimb muscle mass.

The distribution of muscle group mass relative to total forelimb muscle mass is shown in Figure 1. Muscles with synergistic functions are combined into one functional group, and muscles with multiple actions (e.g., pectoralis) and biarticular muscles (e.g., TBLO) are included in more than one functional group. Notably, the largest functional group is the limb retractors, which account for  $47.2 \pm 1.6\%$  of total forelimb muscle mass (Fig. 1). The second and third largest functional groups are the limb protractors and elbow extensors, respectively, which account for  $25.7 \pm 1.7\%$  and  $18.0 \pm 0.5\%$  of the forelimb muscle mass. Along the antebrachium, the digital flexors are a relatively large functional group and account for  $6.5 \pm 0.5\%$  of the forelimb muscle mass, while the carpal flexors and pronators are much smaller and have masses that each account for approximately 1% of total forelimb muscle mass (Fig. 1).

### Muscle architectural properties

Extrinsic muscles acting on either the scapula or humerus all have long fascicles arranged in a parallel fiber architecture, whereas the intrinsic muscles generally become progressively more pennate along the length of the groundhog forelimb. The muscles with the longest fascicles are two of the main limb retractors, latissimus dorsi (LAT:  $13.7 \pm 2.0$  cm) and pectoralis profundus (PP:  $10.3 \pm 2.7$  cm) (Table 2). Other muscles spanning the shoulder joint, including pectoralis superficialis and cleidobrachialis, and several elbow extensor muscles (e.g., lateral and medial heads of the triceps brachii) also have relatively long fascicles, each with a mean fascicle length greater than 4 cm. With the exception of brachioradialis, flexor digitorum profundus humeral head B (FDPHB), and both heads of the extensor carpi radialis, the remainder of the muscles of the brachium and antebrachium have relatively short fascicles 2.3 cm or less in length. The flexor digitorum superficialis condylar head (FDSC:  $1.2 \pm 0.3$  cm) is among the muscles with the shortest mean fascicle lengths (Table 2).

Ratios of fascicle length ( $l^F$ ) to muscle length (ML) are shown in Figure 2, where higher values indicate greater range of contraction and fascicle shortening capability. Nearly half of the muscles of the forelimb have an  $l^F$ /ML ratio of 0.6 or greater. There is a consistent pattern among some functional muscle groups for example the scapular elevator/stabilizers, which all have very high  $l^F$ /ML ratios. The rhomboideus captis has the single highest ratio of all muscles with a mean of  $0.99 \pm 0.1$  (Fig. 2). Of the limb retractors, LAT, deltoideus clavicular head, and both heads of the pectoralis each have a high  $l^F$ /ML ratio exceeding 0.8. Except for the unipennate TBLO, which has a relatively low  $l^F$ /ML ratio, the elbow extensors as a functional group have also have high ratios ranging between 0.72–0.83. In general, muscles of the antebrachium are pennate and are calculated to have ratios less than 0.35, with the bipennate FDSC having the lowest ratio of all muscles with a mean of  $0.17 \pm 0.03$  (Fig. 2).

On average, resting pennation angles ( $\theta$ ) range from 0–32°, with many muscles displaying unipennate fiber architecture. Muscles with the highest mean pennation angles are the bipennate flexor digitorum superficialis epicondylar head (FDSE:  $32 \pm 7^\circ$ ) and the multipennate subscapularis (SUB:  $31 \pm 7^\circ$ ) (Table 2). A number of unipennate muscles including the deltoideus scapular head, teres major, infraspinatus, and TBLO, all have mean pennation angles greater than 25°. Corresponding with their relatively high values of  $\theta$  and short fascicles, the two muscles with the highest PCSA are the SUB and TBLO (Table 3). Additional muscles functionally

grouped as limb retractors have modest PCSA ( $\sim 2.5 \text{ cm}^2$ ), while all other muscles have relatively low PCSA with values ranging from  $0.2\text{--}2.0 \text{ cm}^2$ .

Ratios of PCSA to muscle mass (MM) (or size-adjusted PCSA) are shown in Figure 3, where higher values indicate greater force production capability. The digital extensors, pronator quadratus, and supinator have low mass, and correspondingly have the highest PCSA/MM ratios. The FDSC and brachialis also have high ratios of approximately 0.8 (Fig. 3). In contrast, the major muscles that act to retract the forelimb, and those that extend the elbow joint, have the lowest PCSA/MM ratios (range  $0.07\text{--}0.35$ ). Despite its relatively low mean PCSA/MM ratio of  $0.35 \pm 0.04$ , the massive TBLO has the highest estimated isometric  $F_{\max}$  of 141.8 N (Table 3). The intrinsic shoulder muscles and carpal/digital flexors show intermediate PCSA/MM ratios, generally ranging between  $0.3\text{--}0.6$  (Fig. 3). Among these muscle groups, only the SUB (123.6 N) and supraspinatus (83.3 N) have relatively high estimates of  $F_{\max}$ , whereas no other single muscle in the entire forelimb is estimated to produce greater than 80 N of isometric force (Table 2). Figure 4 shows the estimated summed total isometric force each functional muscle group is capable of producing. The shoulder joint flexors have an average summed isometric  $F_{\max}$  of nearly 500 N, which is approximately 2x greater than the total force of both the shoulder extensors and elbow extensors. The elbow extensors have a mean summed isometric  $F_{\max}$  that is nearly 3x greater than the elbow flexors, and this similar to the comparison between the digital flexors and digital extensors. The carpal flexors and extensors have the lowest summed isometric  $F_{\max}$  values of all functional groups (Fig. 4).

Muscles with both relatively high force and shortening capabilities indicate higher work and power capacity. As shown in Figure 5, no muscles of the groundhog forelimb are capable of high power output. The muscles with the highest individual estimates of instantaneous power are the LAT (4.0 W), pectoralis superficialis (3.7 W), TBLO (2.6 W) and trapezius cervicis (2.4 W), and these are the same muscles that have the highest masses and volumes (Table 2). As a functional group, the elbow extensors have appreciable power capacity (6.2 W), while the elbow flexors are capable of generating low power (1.7 W). The carpal and digital flexor muscles have a modest combined power of 2.4 W (Table 2).

Lastly, few muscles of the groundhog forelimb have appreciable muscle moment arms ( $r_m$ ) and estimated joint torques (Table 4). Despite having a longer mean  $r_m$  ( $2.8 \pm 0.6 \text{ cm}$ ) at the shoulder joint, the PS has a lower joint torque (223 N.cm) than the TBLO, which has the highest



estimated joint torque of 263 N.cm. All other limb retractor muscles have relatively little ability to apply a flexor torque at the shoulder joint. Except for the LAT, which has a modest joint torque value, muscles with the lowest estimated joint torque generally have the highest  $l^F/r_m$  ratios (Table 3). At the elbow joint, again the massive, unipennate TBLO is estimated to be able to apply a high joint torque of 236 N.cm, whereas the remaining elbow extensors have considerably lower values of estimated joint torque and much greater ability to move the elbow joint through a large range of motion. Surprisingly, the FDS (both heads) and FDP (all heads combined with a common tendon of insertion) each have relatively low estimated values of joint torque at the carpus that collectively do not exceed a total of 100 N.cm (Table 3).

### MHC isoform composition

Forelimb muscles showed expression of three MHC isoform bands: MHC-1, 2A, and 2X. Slow MHC-1 and fast MHC-2A bands were clearly resolved in all muscles from each individual; however, the fast MHC-2X isoform was not expressed in all muscles sampled from the groundhog (Table 4). Across all muscles studied, MHC-2A was the predominant isoform expressed and the relative mean percentage of this isoform was fairly consistent (range: 63–80%) along the forelimb (Table 4). The limb retractors are composed of nearly equal percentages the MHC-1 and 2X isoforms (Fig. 6). The elbow extensors have an overall faster MHC isoform composition than that of the limb retractors with a mean of  $20.7 \pm 2.6\%$  for fast MHC-2X isoform, which is twice the mean for slow MHC-1 in these muscles. Finally, MHC isoform composition for the carpal/digital flexors shows a trend of increasing slower-contracting fibers in the distal forelimb by the lack of expression of the fast MHC-2X isoform (Table 4; Fig. 6).

## DISCUSSION

The relationship between muscle architectural properties and the observed scratch-digging habits of mammals is not well established. Building on our previous study of the American badger (Moore et al., 2013), we evaluated internal muscle properties in the forelimb of a generalized burrower to distinguish muscle traits (e.g., muscle mass, fascicle length, and MHC content) that indicate fossorial specialization from basic traits common to mammals that have some digging ability. A large investment of mass in shoulder muscles suggests the importance of limb retraction for scratch-digging in groundhogs. In particular, the massive extrinsic muscles (e.g., LAT, PS, and PP) have a high capacity to shorten and a low capacity for force production due to their long, parallel fascicles, and this reflects an ability to retract the forelimb through a large



range of motion during the power stroke. With the exception of the clavicular part of the deltoideus, the intrinsic shoulder muscles have moderate shortening and force capacity (AI ratios: 0.3–0.6) indicating the ability to appreciably supplement work and power at the shoulder joint for burrowing. However, the architectural properties of the intrinsic limb retractors (e.g., ISP) and protractors (e.g., SUB) also indicate roles in shoulder joint stabilization. On average, no muscles acting at the shoulder joint (or on the scapula) have a high isometric  $F_{\max}$ , and numerous muscles have the capability to shorten at moderate velocity based on both their long fascicle length and high percentages of the fast MHC-2A isoform. Correspondingly, all muscles of the groundhog forelimb are capable of generating only moderate-to-low power as we hypothesized. By a comparison of mass normalized values, power capacity of badgers (Moore et al., 2013) exceeds that of the same muscles in groundhogs, and yet no badger forelimb muscle is capable of markedly high power output as estimated for some hindlimb muscles of cursorial mammals (Williams et al., 2007a, 2008). In addition to digging shallow burrows for shelter, American badgers actively hunt ground-dwelling rodents by rapid excavation of their burrows (Michener, 2004), whereas as groundhogs may burrow at a slower rate to dig deeper, more complex burrow systems. Therefore, differences in digging strategy may reflect selection for differences in muscle power capacity and fossorial ability between these two scratch-digging species.

Muscles with long fascicles and high mass also depend on fast MHC isoforms to be powerful. The LAT and PS have the highest values of instantaneous power (~4.0 W) and each muscle is similar in its composition of MHC-1, 2A, and 2X. The expression of the 2X isoform in the LAT and PS suggests moderate glycolytic properties for power to retract (or force to support) the limb during digging or terrestrial locomotion. Assuming the presence of MHC-2X and the lack of MHC-2B, our isoform composition for the TMJ is similar to the ‘white’ and FG fiber distributions previously reported for this muscle in ground squirrels (Goldstein, 1971) and tuco-tucos (Alvarez et al., 2012), respectively. Also consistent among scratch-digging rodents is a heterogeneous distribution of fiber types in shoulder and elbow joint muscles, and an overall prevalence either slow or fast, oxidative fibers, as predicted. For example, high percentages of FOG fibers in tuco-tucos match well with a primary composition of MHC-2A in all the forelimb muscles of groundhogs that were studied. MHC-2A fibers are highly oxidative and recruited for sustained force and power (Rupert et al., 2014), and while digging habits and locomotor mechanics of groundhogs are largely unknown, these properties seem appropriate for progressive

burrowing. Moreover, fast MHC-2B was not found as expected, and this is consistent with the high metabolic demands of burrowing requiring sustained activity and fatigue resistance. Additional analyses are needed to specifically assess if a similar composition of fast MHC isoforms is present in homologous forelimb muscles of other scratch-diggers is consistently related to a given level of fossorial ability.

Although kinematic data do not exist for groundhogs during burrowing, simultaneous retraction of the limb and extension of the elbow joint occurs at the outset of the power stroke in scratch-diggers (Stalheim-Smith, 1984; Moore et al., 2013). At the shoulder joint, the unipennate TBLO can apply the largest torque (flexor moment) of any muscle studied because of its relatively long moment arm and large PCSA, and thus is hypothesized to function synergistically as a limb retractor. In addition, an equally long moment arm at the elbow joint allows the biarticular TBLO the capacity to apply a similarly large amount of joint torque. These findings are similar to those in the badger where it was estimated that the TBLO could apply the highest shoulder flexor and elbow extensor moments (Moore et al., 2013). However, the somewhat low  $l^F/r_m$  ratios of this muscle at both joints suggests its role in full rotation of the limb segments may be limited. Therefore, the TBLO might act to stabilize each joint against substrate reaction forces during the power stroke in these two species, but this functional interpretation will need to be verified by *in vivo* measurements of fascicle contractile behavior. In either case, relatively high  $F_{max}$ , torque, and power properties of the TBLO in particular, may indicate muscle specialization for scratch-digging. Our future investigations of internal architectural properties in the forelimbs of highly fossorial scratch-digging mammals will help to clarify adaptive traits.

Elbow extension throughout the power stroke is also important, and the elbow extensors of the groundhog account for relatively large portion of its total forelimb muscle mass. Specifically, this feature is consistent across scratch-digging rodents for which relative muscle mass has been quantified (Lehmann, 1963; Gambaryan and Gasc, 1993). In addition, the total PCSA of the m. triceps brachii of groundhogs is in similar high proportion to that measured in the forelimbs of European ground squirrels (Lagaria and Youlatos, 2006), reflecting the importance of force in this functional muscle group to burrowing rodents. Given that the large PS and PP are limb adductors and this action also occurs throughout the power stroke, it is noteworthy to observe that muscles involved in adduction account for less total forelimb muscle mass than the elbow extensors. Adding to the mass of the elbow extensors, the accessory head of the triceps brachii is

fused with the TBM, and as a whole muscle, has long, parallel fascicles that provide it with high shortening capability, but low force production ability. Having similar properties, the lateral and medial/accessory heads of the triceps are best suited to actively extend the elbow joint throughout the power stroke to enable the forelimbs to move soil to the hindlimbs. The modest power of the lateral head (~2.0 W) in addition to a nearly 20% composition of the fast MHC-2X isoform indicates its capacity for appreciable shortening and extending of the elbow joint during the power stroke. However, the relatively low joint torque of lateral and medial/accessory heads, may also suggest a role in elbow joint stabilization during slow terrestrial locomotion. Interestingly, the TBL and TBLO have nearly identical MHC isoform compositions, which may suggest that these muscles perform the synergistic function of elbow extension.

As observed in other scratch-diggers, the digital flexor muscles are relatively massive in groundhogs, and account the highest percentage of muscle mass in the antebrachium. The difference in mass between the digital and carpal flexors reflects the importance of strong digital flexion for scratch-digging (Hildebrand, 1985). This may be especially true for groundhogs which have short claws. The FDP is a relatively large muscle with four heads and a range of fiber architectures, while the FDS has two bipennate heads that combined are more massive than the FDP. With the exception of a small FDP profundus (FDPHP) (also observed in the hare: Williams et al., 2007b) which has high fascicle shortening capability, the digital flexors as a muscle complex almost uniformly have the functional properties to perform appreciable mechanical work. It is expected that work done to flex the digits would not only maintain the digits in a flexed position throughout the power stroke, but also augment the total force applied to the substrate by exerting moderate joint torque at the carpal, MCP, and IP joints. Overall, the muscle architecture of the digital flexors is as hypothesized, but this muscle group in the groundhog is not as functionally compartmentalized compared with that of the badger (Moore et al., 2013). Both relatively high  $F_{\max}$  and long moment arm at the carpal joint indicate that the FDS is mechanically well-suited for flexion of the carpus, which is additionally important for scratch-digging. The FCR and FCU, however, have a low combined muscle mass and relatively low force production, power, and joint torque capability, suggesting that they are less well suited for strong carpal joint flexion during the power stroke.

Despite the differences in muscle architectural properties between the carpal and digital flexors, these muscles equally do not express the fast MHC-2X isoform. This result somewhat

contradicts our hypothesis and instead emphasizes lower force and power, but higher fatigue resistance in the these functional muscle groups. A generalized burrower that uses its forelimbs for additional functional behaviors including terrestrial locomotion and food manipulation was expected to have a heterogeneous composition of MHC-1, 2A, and 2X throughout the forelimb musculature. While published data for the carpal/digital flexors of other digging rodents are not available for comparison, an expression of only MHC-1 and 2A may be related to the potential use of a carpal-only (via carpal flexion) mode of scratch-digging in groundhogs (Ponomarenko et al., unpublished data). The combined architecture and MHC isoform properties of the carpal/digital flexors are well suited for this method of digging. Detailed biomechanical evaluations are needed to understand if the internal muscle properties observed in distal forelimb of groundhogs are modifications for enhanced carpal flexion digging.

### **Comparative and functional insights**

To place the muscle traits observed in the groundhog into a proper evolutionary context, morphological comparisons with the forelimbs of mammals specialized for behaviors other than scratch-digging are also necessary to evaluate traits for fossoriality. Quantitative evaluations of limb muscle architecture and fiber type have mainly focused on cursorial adaptations (e.g., Alexander, 1984; Panye et al., 2005; Toniolo et al., 2007; Williams et al., 2007); however, functional insights can be gained by interpretation of available muscle data in mammals that climb, a locomotor behavior that shows a number of morphological trade-offs with fossorial habit (Stalheim-Smith, 1984, 1989; Rose et al., 2014).

Climbing mammals have relatively less intrinsic muscle mass for elbow extension and digital flexion (Gambaryan 1974; Taylor, 1978; Moore, 2011), and variation in relative extrinsic muscle mass is largely explained by the absence of muscles. For example, the rhomboideus capitis (and profundus) is commonly absent (Fisher et al., 2009), which may indicate less ability to protract the limb and stabilize the scapula cranially. Climbers invest in large pectoralis muscles as do scratch-diggers, but they may show relatively greater division of the pectoralis superficialis and profundus (Harrison, 1882; Julik et al., 2012) for strong adduction and increased grasping control of the forelimb during climbing. A broad caudal origin of the latissimus dorsi is also generally similar between climbers and scratch-diggers, indicating that long fascicles for shortening and power output are important to both habits. However, there is evidence that some climbing mammals also have a broad and distal insertion of the teres major on the humerus (Taylor, 1978),

thus increasing its  $r_m$  and ability to apply a large flexor moment at the shoulder joint. We previously found the size-specific mass of the teres major in the opossum to be significantly higher than that of the badger (Moore, 2011), and this may be an alternative strategy to increase the applied flexor moment in more generalized climbers. Moreover, climbing mammals often have both an articularis humeri and a well-developed coracobrachialis (Fisher et al., 2009) indicating the need for shoulder joint stability during arboreal maneuvering and additionally, emphasizing the importance of limb adduction.

Aside from lower muscle mass, mammals may show modifications to muscle origins and the number of heads of the triceps brachii. A long head originating on the scapula is the typical mammalian condition and is a feature consistent among climbers (Stalheim-Smith, 1984; Thorington et al., 1997; Fisher et al., 2009). However, the presence of additional scapular heads of the triceps as observed in badgers (Moore et al., 2013), skunks (Ercoli et al., 2014), and armadillos (Windle and Parsons, 1899), is not a feature observed in climbers, although the origin of the long head on the scapula may be broad (Harrison, 1882). Carnivores that climb often have a second accessory head associated with the medial head (Fisher et al., 2009; Julik et al., 2012). Multiple accessory heads suggest greater joint position control for precise movements on narrow substrates, while having two biarticular heads of the triceps can substantially increase of the flexor moment applied at the shoulder joint for retraction of the forelimb to excavate earth (Moore et al., 2013). The lack of each of these modifications in the groundhog is consistent with its classification as less specialized burrower.

In contrast to the elbow extensors, climbing mammals have relatively more well-developed elbow flexors than scratch-diggers. Significantly larger flexor mass can help provide the propulsion to move up a vertical substrate (Moore, 2011), and large joint torques applied by the biceps brachii and brachialis have been shown to distinguish elbow flexor function between climbers and scratch-diggers (Stalheim-Smith, 1984). Indeed, a size-specific value of  $0.14 \text{ N}\cdot\text{mm g}^{-1}$  calculated for the combined joint torque for the elbow flexors of both groundhogs and badgers is low compared with an average value of  $0.40 \text{ N}\cdot\text{mm g}^{-1}$  reported for scansorial fox squirrels and raccoons (Stalheim-Smith, 1989). The elbow flexors in scratch-diggers may therefore play a role in counterbalancing large elbow extensor torques (Moore et al., 2013), as opposed to initiating limb recovery (via elbow flexion) at the end of the power stroke. Perhaps it is for this function that groundhogs and other sciurids have a separate cleidobrachialis that inserts

on the ulna (Thorington et al., 1997), instead of the humeral insertion observed in climbing mammals (Harrison, 1882; Fisher et al., 2009). In addition, the origin of both the brachioradialis and ECR is shifted more proximally on the humerus in some climbers, thus increasing their  $r_m$  at the elbow joint and their ability to augment elbow flexor torque. Available data indicate these two muscles are relatively more massive in tamanduas (Taylor, 1978) versus groundhogs, and they also may be compartmentalized with a range of fascicle lengths indicating specialization for elbow joint rotation. For example, the  $l^F/r_m$  ratios of the ECR in raccoons is  $>2.0$  (McClearn, 1985), and these data relate to their marked ability to rotate the elbow joint in flexion.

The carpal and digital flexors show marked differences between climbing and scratch-digging mammals. Significantly less mass is dedicated to the carpal/digital flexors compared with the digital extensors (Moore, 2011), and this reflects overall lower force of these functional muscle groups in climbers. Correspondingly, the observed variation in muscle origins, number of muscle bellies (and their mass), and fiber architecture is most likely related to additional dexterity of the digits for grasping in arboreal locomotion. For example, climbers often have a fleshy origin of the flexor digitorum superficialis from the flexor digitorum profundus instead of a strong attachment to the humerus (McClearn, 1985; Fisher et al., 2009). The number of heads of the profundus and the arrangement of the flexor tendons serving the digits also show a wide range of variation. Whereas the groundhog have only four heads of profundus with tendons to digits II–V, climbing mammals have five heads with tendons serving all five digits (McClearn, 1985; Julik et al., 2012). However, carpal/digital flexors with considerable pennation and shorter fascicles is a feature consistent across climbing and digging taxa studied (McClearn, 1985; Julik et al., 2012; Moore et al., 2013), although the ability to move the carpus and digits through a large range of motion may be greater in climbers relating to their enhanced dexterity. In addition, the FCU of the opossum was found to have significantly more mass and PCSA than that of the badger (Moore, 2011). This finding may reflect the importance of carpal abduction when climbing vertical substrates. Despite having potentially shorter  $r_m$  lengths at the carpus than diggers, the insertion of the FCU in some climbers extends to the base of metacarpal V (Harrison, 1882), which increases its ability to abduct the carpal joint.

Finally, the lack of studies that have identified MHC expression in the limbs of climbing and digging adapted mammals make comparative interpretations difficult. In general, available data indicate that the forelimb muscles of climbers are faster-contracting and fatigue more easily than



those of scratch-digging mammals (Stalheim-Smith, 1984). The predominance of MHC-2A in groundhog forelimbs is interesting with respect to previous findings of large distributions of fast Type II fibers in scansorial mammals (Hansen et al., 1987) and studies of MHC isoforms in other species of squirrels (Rourke et al., 2004; Reiser et al., 2009) that did not identify the 2A isoform. Our recent analyses (unpublished data) of MHC isoforms in both tree (*Tamiasciurus hudsonicus*) and ground (*Spermophilus lateralis*) squirrels confirm a primary composition of 2X and 2B isoforms as the fast Type II fibers in selected forelimb muscles of both species. MHC-2A is expressed in the carpal/digital flexors of ground squirrels, suggesting lower sustained force and power properties in the antebrachial muscles of species that share a similar lifestyle and digital manipulation abilities (Nowak, 1999). The lack of expression of MHC-2A in a tree squirrel may also be reflective of its arboreal lifestyle. Ascending trees is a rapid locomotor behavior in sciurids compared with burrowing, thus fast-contracting MHC-2B fibers match the high power requirements for climbing. A last consideration for the differences in MHC expression among diverse genera of squirrels is body size. The general lack of expression of the fast MHC-2X and 2B isoforms in groundhogs may be due to their larger body mass. *T. hudsonicus* and *S. lateralis* are much smaller (200–400 g), thus a large composition of fast MHC isoforms in their skeletal muscles is important for thermoregulation and is consistent with an inverse relationship between MHC shortening velocity and body size (Toniolo et al., 2007). Nonetheless, the disproportionately high MHC-2A content of groundhog muscles is difficult to reconcile for its size and rodent phylogenetic ancestry. It is possible that variation in MHC expression may have evolved as a way to modify muscle structure and function for the different lifestyles of squirrels.

## Conclusions

The groundhog forelimb has the following five features purportedly related to their degree of fossorial ability: 1. humeral retractors, elbow extensors, and digital flexors account for a majority of forelimb muscle mass; 2. latissimus dorsi and pectoralis superficialis have long fascicles and are capable of highest power; 3. pennate triceps brachii long head that has large PCSA and is capable of the highest joint torque at the shoulder and elbow joints; 4. pennate digital flexors capable of appreciable mechanical work to flex the carpus and digits; and 5. primary expression of the MHC-2A isoform in major forelimb muscles associated with scratch-digging function. Overall, the forelimb musculature is capable of relatively low force and power, and has limited ability to apply high joint torque at the shoulder and elbow joints, and these properties are



consistent with its behavioral classification as a less specialized burrower. Modification for scratch-digging is most evident in the distal forelimb and is reflected by complex digital flexors containing only MHC-1 and 2A isoform fibers for sustained force development. The findings of this study and our future investigations will further define muscle traits that are specific to fossorial lifestyle and establish whether these traits are adaptive or phylogenetic in nature.

## MATERIALS AND METHODS

### Study specimens

A total of 8 groundhogs (*Marmota monax* Linnaeus 1758) with an average body mass of  $4.7 \pm 0.8$  kg were used for this study (see Supplemental Table 1 for complete morphometric data from the study specimens). Groundhogs were obtained from licensed hunters and trappers in Mahoning and Columbiana Counties in Ohio USA. Within an hour post-mortem, the carcasses were removed from the field (on ice), frozen, and stored at  $-20^{\circ}\text{C}$  until observation. Specimens were allowed to thaw for 24–36 h at  $4^{\circ}\text{C}$  prior to dissection and measurement. Morphometric data for all specimens are presented as Supplemental data (see Table S1).

### Muscle architecture measurements

Muscle names, origin, and insertion for *M. monax* followed those of Bezuidenhout and Evans (2005), and muscles were grouped based on their main action (Table 2). The forelimbs were skinned and muscles (excluding those of the manus) were identified and systematically dissected. Muscles were periodically moistened with phosphate buffered saline (PBS) to prevent desiccation during dissection and measurement. Muscle architecture was quantified following the procedures used in our previous studies (see Moore et al., 2013; Rose et al., 2013). Briefly, muscle moment arm ( $r_m$ ) and muscle length *in situ* were measured using digital calipers (CD-8 CSX; Mitutoyo, Japan) with the limb joints placed in a neutral position (i.e., angles in which antagonistic muscles could exert equal joint torque). Following removal of muscles and any free tendons, muscle belly mass (MM) was recorded using an electronic balance (accurate to 0.01 g) (PB4002-S/FACT; Mettler-Toledo, Columbus, OH USA), and a measurement of resting muscle belly length (ML) was taken. Muscle bellies were then incised along a visible fascial plane to reveal the fiber fascicles. Resting fascicle length ( $l^F$ ) was measured from 5–10 random fascicles (depending on muscle size) using digital calipers. Resting pennation angle (to the nearest degree) was measured at 5–10 random sites using a goniometer. Lastly, forelimb bone length and width

measurements were recorded and several functional osteological indices (Rose et al., 2014) were calculated (see Supplemental data Table S1).

### **MHC isoform identity and composition**

Small blocks of muscle tissue were harvested from the mid-belly region of selected forelimb muscles from a subset of  $N=4$  random specimens after measurement. Muscle tissue was prepared for SDS-PAGE by freezing in liquid nitrogen, grinding to powder, homogenizing 50 mg of muscle powder in 800 ml (ratio 1:16) of Laemmli buffer (Laemmli, 1970; Toniolo et al., 2007), and centrifugation of the homogenates at 13k rpm for 10 min (Rupert et al., 2014). Samples for gel loading were diluted (1:500) in gel sample buffer (Mizunoya et al., 2008) to a final protein concentration of  $\sim 0.125 \mu\text{g/ml}$ . MHC isoforms were identified on SDS-PAGE gels using established methods (Talmadge and Roy, 1993) performed with slight modifications (Mizunoya et al., 2008) as previously described (Hazimihalis et al., 2013; Rupert et al., 2014). Gels were loaded with a total of  $\sim 1 \mu\text{g}$  of protein per lane, stained with silver (Bio-Rad, Hercules, CA USA), and imaged using a Fluor-Chem E Imaging System (Cell Biosciences, Santa Clara, CA USA). MHC isoform content was quantified by densitometry in Image J (v.1.43: NIH) using the brightness area product method (BAP) similar to Toniolo et al. (2008). Band intensity values in each gel lane were summed and used to calculate a percentage for each MHC isoform expressed in a single muscle. Percentages of the MHC isoforms for each muscle were averaged across three independent gel runs per specimen to provide an overall mean percentage composition of slow and fast MHC isoforms.

### **Muscle functional properties and Architectural indexes**

Muscle volume was calculated by dividing mean MM by a muscle density of  $1.06 \text{ g cm}^{-3}$  (Mendez and Keyes, 1960). PCSA was calculated as  $(\text{muscle volume}/\text{mean } l^F) \times \cos \theta$ , where  $\theta$  is mean pennation angle (in deg). Isometric force ( $F_{\text{max}}$ ) was estimated by multiplying PCSA by a maximum isometric stress of  $30 \text{ N cm}^{-2}$  (Woledge et al., 1985; Medler, 2002). Joint torque was calculated as  $F_{\text{max}} \times r_m$ . Muscle power (W) was estimated to be one tenth the product of  $F_{\text{max}}$  and  $V_{\text{max}}$  (Hill, 1938), where  $V_{\text{max}}$  is maximum fiber shortening velocity (in  $\text{FL s}^{-1}$ ). A size-specific value of  $1.97 \text{ FL s}^{-1}$  for a 4.7 kg groundhog was predicted using published slack test data for fast MHC-2A fibers (determined to be the primary isoform: see below) at  $12^\circ\text{C}$  (Toniolo et al., 2007). Accounting for a  $Q_{10}$  (temperature quotient) of 2–6 for  $V_{\text{max}}$  (Pate et al., 1994; Ranatunga, 1996), a value of  $7.87 \text{ FL s}^{-1}$  was calculated as  $V_{\text{max}}$  at physiologic temperature for groundhogs ( $37.8^\circ\text{C}$ :

Hayes, 1976). Importantly, calculations of  $F_{\max}$  and  $V_{\max}$  are only estimates, and are used here to indicate muscle functional capacity (Williams et al., 2007a; Smith et al., 2006).

Descriptive statistics for raw measurements are reported as means ( $\pm$ s.d.). Calculated and estimated functional properties are presented as single values consistent with our previous studies (see Moore et al., 2013; Rose et al., 2013). Mass of each muscle group was normalized to total forelimb muscle mass and presented as an architectural index (AI) of proximal-to-distal muscle mass distribution (Smith et al., 2006; Williams et al., 2008). Ratios of PCSA/MM,  $I^F$ /ML, and  $I^F/r_m$  (Moore et al., 2013; Rose et al., 2013) were calculated as additional AI's to assess muscle functional capacity.

### Acknowledgments

We sincerely thank D. Benyo, A. Moore, J. Copploe, M. Thornhill, M. Madgar, and D. Graban for help with specimen collection, measurement, and protein analysis. We also thank two anonymous reviewers for critical comments and discussions of this work. The YSU Department of Biological Sciences and IUSM Department of Anatomy and Cell Biology are also gratefully acknowledged.

### Competing interests

The authors declare no competing financial interests.

### Author contributions

J.E.R. performed experiments and data analysis, and prepared the manuscript for submission; J.A.R. performed experiments and data analysis; J.M.O. edited the manuscript; and M.T.B. developed the concepts and approach, supervised data collection and analysis, and prepared the manuscript for submission.

### Funding

Support was provided by a University Research Council Grant (YSU #02-12).

**List of symbols and abbreviations**

|            |                                    |
|------------|------------------------------------|
| $\theta$   | pennation angle                    |
| $F_{\max}$ | maximum isometric force            |
| $l^F$      | fascicle length                    |
| MHC        | myosin heavy chain                 |
| ML         | muscle belly length                |
| MM         | muscle belly mass                  |
| PCSA       | physiological cross-sectional area |
| $r_m$      | muscle moment arm                  |
| $V_{\max}$ | maximum shortening velocity        |
| W          | muscle power                       |

## References

- Alexander, R. McN., Jayes, A. S., Maloiy, G. M. O. and Wathuta, E. M.** (1981). Allometry of the leg muscles of mammals. *J. Zool.* **194**, 539–552.
- Alexander, R. McN.** (1984). Elastic energy stores in running vertebrates. *Am. Zool.* **24**, 85–94.
- Alvarez, G. I., Diaz, A. O., Longo, M. V., Becerra, F. and Vassallo, A. I.** (2012). Histochemical and morphometric analyses of the musculature of the forelimb of the subterranean rodent *Ctenomys talarum* (Octodontidae). *Anat. Histol. Embryol.* **41**, 317–325.
- Bezuidenhout, A. J. and Evans, H. E.** (2005). *Anatomy of the woodchuck (Marmota monax)*. Am Soc Mammal, Stillwater, OK.
- Biewener, A. A.** (2005). Biomechanical consequences of scaling. *J. Exp. Biol.* **208**, 1665–1676.
- Endo, H., Oishi, M., Yonezawa, T., Rakotondraparany, F. and Hasegawa, M.** (2007). The semifossorial function of the forelimb in the common rice tenrec (*Oryzomys hova*) and the streaked tenrec (*Hemicentetes hemispinosus*). *Anat. Histol. Embryol.* **36**, 413–418.
- Eng, C. M., Smallwood, L. H., Rainiero, M. P., Lahey, M., Ward, S. R. and Lieber, R. L.** (2008). Scaling of muscle architecture and fiber types in the rat hindlimb. *J. Exp. Biol.* **211**, 2336–2345.
- Ercoli, M. D., Alvarez, A., Stefanini, M. I., Busker, F. and Morales, M. M.** (2014). Muscular Anatomy of the Forelimbs of the Lesser Grison (*Galictis cuja*), and a Functional and Phylogenetic Overview of Mustelidae and Other Caniformia. *J. Mammal. Evol.* DOI 10.1007/s10914-014-9257-6.
- Fisher, R. E., Adrian, B., Barton, M., Holmgren, J. and Tang, S. T.** (2009). The phylogeny of the red panda (*Ailurus fulgens*): evidence from the forelimb. *J. Anat.* **215**, 611–635.
- Gambaryan, P. P.** (1974). *How Mammals Run*. John Wiley & Sons, New York
- Gambaryan, P. P. and Gasc, J-P.** (1993). Adaptive properties of the musculoskeletal system in the mole-rat, *Myospalax myospalax* (Mammalia, Rodentia), cinefluorographical, anatomical, and biomechanical analyses of burrowing. *Zool. Jb. Anat.* **123**, 363–401.
- Goldstein, B.** (1971). Heterogeneity of muscle fibers in some burrowing mammals. *J. Mammal.* **52**, 515–527.
- Hamilton, W. J. Jr.** (1934). The life history of the rufescent woodchuck, *Marmota monax rufescens* Howell. *Annals Carnegie Mus.* **23**, 85–178.
- Hansen, S., Cutts, J. H., Krause, W. J. and Cutts, J. H.** (1987). Distribution of fibre types in

- thirty-seven muscles of *Didelphis virginiana*. *Anat. Anz.* **164**, 153–158.
- Harrison, A.** (1882). The muscles of the limbs of the raccoon (*Procyon lotor*). *Proc. Acad. Nat. Sci. Philadelphia.* **34**, 115–144.
- Hayes, S. R.** (1976). Daily activity and body temperature of the southern woodchuck, *Marmota monax monax*, in Northwestern Arkansas. *J. Mammal.* **57**, 291–299.
- Hazimihalis, P. J., Gorvet, M. A. and Butcher, M. T.** (2013). Myosin isoform fiber type and fiber size in the tail of the Virginia opossum (*Didelphis virginiana*). *Anat. Rec.* **296**, 96–107.
- Hildebrand, M.** (1985). Digging of Quadrupeds. In: Hildebrand M, Bramble DM, Liem KF, Wake DB, editors. *Functional Vertebrate Morphology*. Cambridge, Massachusetts: The Belknap Press of Harvard University Press. p 89–109.
- Hill, A. V.** (1938). The heat of shortening and the dynamic constants of muscle. *Proc. Roy. Soc. Lond. B.* **126**, 136–195.
- Julik, E., Zack, S., Adrian, B., Maredia, A., Parsa, A., Poole, M., Starbuck, A. and Fisher, R. E.** (2012). Functional Anatomy of the Forelimb Muscles of the Ocelot (*Leopardus pardalis*). *J. Mammal. Evol.* **19**, 277–304.
- Kley, N. J. and Kearney, M.** (2007). Adaptations for Digging and Burrowing. Pp. 284–309 in *Fins into Limbs* (B. Hall, ed.) University of Chicago Press, Chicago, Illinois.
- Kwiecinski, G. G.** (1998). *Marmota monax*. *Mammal. Species* **591**, 1–8.
- Laemmli, U. K.** (1970). Cleavage of structural proteins during the assembly of the head of bacteriophage T4. *Nature* **227**, 680–685.
- Lagaria, A. and Youlatos, D.** (2006). Anatomical correlates to scratch digging in the forelimb of European ground squirrels (*Spermophilus citellus*). *J. Mammal.* **87**, 563–570.
- Lehmann, W. H.** (1963). The forelimb architecture of some fossorial rodents. *J. Morphol.* **113**, 59–76.
- Lieber, R. L.** (2009). *Skeletal Muscle, Structure, Function, and Plasticity* 3<sup>rd</sup> ed. Lippincott Williams & Wilkins, Baltimore. Maryland. P. 369
- Medler, S.** (2002). Comparative trends in shortening velocity and force production in skeletal muscles. *Am. J. Physiol. Regul. Integr. Comp. Physiol.* **283**, R368–78.
- Meier, P. T.** (1992). Social organization of woodchucks (*Marmota monax*). *Behav. Ecol. Sociobiol.* **31**, 393–400.

- Mendez, J. and Keyes, A.** (1960). Density and composition of mammalian muscle. *Metabol.* **9**, 184–188.
- Mizunoya, W., Wakamatsu, J., Tatsumi, R. and Ikeuchi, Y.** (2008). Protocol for high-resolution of rodent myosin heavy chain isoforms in a mini gel-electrophoresis system. *Anal. Biochem.* **377**, 111–113.
- Moore, A. L.** (2011). Functional specialization in the intrinsic forelimb musculature of the American badger (*Taxidea taxus*). Masters Thesis, Youngstown State University, Ohio USA.
- Moore, A. L., Budny, J. E., Russell, A. P. and Butcher, M. T.** (2013). Architectural specialization of the intrinsic forelimb musculature of the American badger (*Taxidea taxus*). *J. Morphol.* **274**, 35–48.
- Pate, E., Wilson, G. H., Bhimani, M. and Cooke, R.** (1994). Temperature dependence of the inhibitory effects of orthovanadate on shortening velocity in fast skeletal muscle. *Biophys. J.* **66**, 1554–1652.
- Payne, R. C., Veenman, P. and Wilson, A. M.** (2005). The role of the extrinsic thoracic limb muscles in equine locomotion. *J. Anat.* **206**, 193–204.
- Ranatunga, K. W.** (1996). Endothermic force generation in fast and slow mammalian (rabbit) muscle fibers. *Biophys. J.* **71**, 1905–1913.
- Reiser, P. J., Bicer, S., Chen, Q., Zhu, L. and Quan, N.** (2009). Masticatory ('superfast') myosin heavy chain and embryonic/atrial myosin light chain 1 in rodent jaw-closing muscles. *J. Exp. Biol.* **212**, 2511–2519.
- Rose, J. A., Sandefur, M., Huskey, S., Demler, J. L. and Butcher, M. T.** (2013). Forelimb muscle architecture and force production potential in the eastern mole (*Scalopus aquaticus*). *J. Morphol.* **274**, 1277–1287.
- Rourke, B. C., Yokoyama, Y., Milsom, W. K. and Caiozzo, V. J.** (2004). Myosin isoform expression and MAFbx and mRNA levels in hibernating golden-manteled ground squirrels (*Spermophilus lateralis*). *Physiol. Biochem. Zool.* **77**, 582–593.
- Rupert, J. E., Moriera, A., Cordero Schmidt, E., VandeBerg, J. L., Rodriguez Herrera, B. and Butcher, M. T.** (2014). Myosin heavy chain (MHC) isoform expression in the prehensile tails of didelphid marsupials: functional differences between arboreal and terrestrial opossums. *Anat. Rec.*, In press.



- Schiaffino, S. and Reggiani, C.** (1996). Molecular diversity of myofibrillar proteins: gene regulation and functional significance. *Physiol. Rev.* **76**, 371–423.
- Schiaffino, S. and Reggiani, C.** (2011). Fiber types in mammalian skeletal muscle. *Physiol. Rev.* **91**, 1447–1531.
- Smith, N. C., Wilson, A. M., Jespers, K. J. and Payne, R. C.** (2006). Muscle architecture and functional anatomy of the pelvic limb of the ostrich (*Struthio camelus*). *J. Anat.* **209**, 765–779.
- Snyder, R. L., Davis, D. E. and Christian, J. J.** (1961). Seasonal changes in the weights of woodchucks. *J. Mammal.* **42**, 297–312.
- Stalheim-Smith, A.** (1984). Comparative study of the forelimbs of the semifossorial prairie dog, *Cynomys gunnisoni*, and the scansorial fox squirrel, *Sciurus niger*. *J. Morphol.* **180**, 55–68.
- Stalheim-Smith, A.** (1989). Comparison of the muscle mechanics of the forelimb of three climbers. *J. Morphol.* **202**, 89–98.
- Steppan, S. J., Akhverdyan, M. R., Lyapunova, E. A., Fraser, D. G., Vorontsov, N. N., Hoffmann, R. S. and Braun, M. J.** (1999). Molecular phylogeny of the marmots (Rodentia: Sciuridae): tests of evolutionary and biogeographic hypotheses. *Syst. Biol.* **48**, 715.
- Steppan, S. J., Storz, B. L. and Hoffmann, R. S.** (2004). Nuclear DNA phylogeny of the squirrels (Mammalia: Rodentia) and the evolution of arboreality from c-myc and RAG1. *Mol. Phylogenet. Evol.* **30**, 703–719.
- Swihart, R. K.** (1992). Home-range attributes and spatial structure of woodchuck populations. *J. Mammal.* **73**, 604–618.
- Talmadge, R. J. and Roy, R. R.** (1993). Electrophoretic separation of rat skeletal muscle myosin heavy-chain isoforms. *J. Appl. Physiol.* **75**, 2337–2340.
- Taylor, B. K.** (1978). The anatomy of the forelimb in the anteater (*Tamandua*) and its functional implications. **157**, 347–368.
- Thorington, R. W. Jr., Darrow, K. and Betts, A. D. K.** (1997). Comparative myology of the forelimb of squirrels. *J. Morphol.* **234**, 155–182.
- Toniolo, L., Cancellara, P., Maccatrozzo, L., Patruno, M., Mascarello, F. and Reggiani, C.** (2008). Masticatory myosin unveiled: first determination of contractile parameters of muscle fibers from carnivore jaw muscles. *Am. J. Physiol. Cell Physiol.* **295**, 1535–1542.

- Toniolo, L., Maccatrozzo, L., Patruno, M., Pavan, E., Caliaro, F., Rossi, R., Rinaldi, C., Canepari, M., Reggiani, C. and Mascarello, F.** (2007). Fiber types in canine muscles: myosin isoform expression and functional characterization. *Am. J. Physiol. Cell Physiol.* **292**, C1915–26.
- Williams, S. B., Payne, R. C. and Wilson, A. M.** (2007a). Functional specialization of the pelvic limb of the hare (*Lepus europeus*). *J. Anat.* **210**, 472–490.
- Williams, S. B., Payne, R. C. and Wilson, A. M.** (2007b). Functional specialization of the thoracic limb of the hare (*Lepus europeus*). *J. Anat.* **210**, 491–505.
- Williams, S. B., Wilson, A. M., Rhodes, L., Andrews, J. and Payne, R. C.** (2008). Functional anatomy and muscle moment arms of the pelvic limb of an elite sprinting athlete: the racing greyhound (*Canis familiaris*). *J. Anat.* **213**, 361–372.
- Windle, B. C. A. and Parsons, F. G.** (1899). On the myology of the Edentata. *Proc. Zool. Soc. Lond.* **67**, 314–339.
- Woledge, R. C., Curtin, N. A. and Homsher, E.** (1985). Energetic aspects of muscle contraction. *Monogr. Physiol. Soc.* **41**, 1–357.
- Zajac, F. E.** (1989). Muscle and tendon: properties, models, scaling, and application to biomechanics and motor control. *Crit. Rev. Biomed. Eng.* **17**, 359–411.
- Zajac, F. E.** (1992). How musculotendon architecture and joint geometry affect the capacity of muscles to move and exert force on objects: a review with application to arm and forearm tendon transfer design. *J. Hand Surg. Am.* **17**, 799–804.

**Fig. 1. Architectural index of the distribution of functional group muscle mass to total forelimb muscle mass.** Total forelimb muscle mass was calculated as the summed mass of all individual muscles studied. Proximal-to-distal muscle group mass is expressed as a percentage, with bars representing means for each functional group. Error bars represent the SD (standard deviation) in all the data figures. Muscles with synergistic functions are combined in one functional group. Biarticular muscles are also included in more than one functional group.

**Fig. 2. Fascicle length ( $l^F$ ) to muscle length (ML) ratios of groundhog forelimb muscles.** High mean values indicate greater range of contraction and greater shortening capability. Muscle abbreviations (same as those listed in Table 3): TC, trapezius pars cervicalis; TT, trapezius pars thoracica; RCP, rhomboideus captis; RCR, rhomboideus cervicis; RT, rhomboideus thoracis; LAT, latissimus dorsi; PS, pectoralis superficialis; PP, pectoralis profundus; DS, deltoideus scapularis; DA, deltoideus acromialis; DC, deltoideus clavicularis; TMJ, teres major; TMN, teres minor; ISP, infraspinatus; SSP, supraspinatus; SUB, subscapularis; CCB, coracobrachialis; CB, cleidobrachialis; BB, biceps brachii; BCH, brachialis; TBLO, triceps brachii-long; TBLA, triceps brachii-lateral; TBMA, triceps brachii-medial/accessory; ANC, anconeus; TFA, tensor fasciae antebrachii; BCR, brachioradialis; PT, pronator teres; FCR, flexor carpi radialis; FCU, flexor carpi ulnaris; FDSE, flexor digitorum superficialis-epicondylar; FDSC, flexor digitorum superficialis-condylar; FDPHM, flexor digitorum profundus-humeral medial; FDPHP, flexor digitorum profundus-humeral profundus; FDPRL, flexor digitorum profundus radial; FDPRL, flexor digitorum profundus ulnar; ECRL, extensor carpi radialis-longus; ECRL, extensor carpi radialis-brevis; ECU, extensor carpi ulnaris; EDC, extensor digitorum communis; EDL, extensor digitorum lateralis; ED2, extensor digiti II; AD1L, abductor digiti I longus; PQ, pronator quadratus; SUP, supinator.

**Fig. 3. Physiological cross-sectional area (PCSA) to muscle mass (MM) ratios of groundhog forelimb muscles.** High mean values indicate either higher degrees of pennation and force production capability. The combination of both higher PCSA/MM and  $l^F$ /ML ratios (see Fig. 2) indicates that a muscle is capable of performing appreciable muscle work. Abbreviations are the same as those in Figure 2.

**Fig. 4. Mean summed isometric force ( $F_{\max}$ ) across the functional muscle groups in the groundhog forelimb.** The functional muscle groups are subdivided by their actions at each limb

joint or segment and include the shoulder flexors ( $N=10$  muscles), shoulder extensors ( $N=4$  muscles), elbow flexors ( $N=3$  muscles), elbow extensors ( $N=5$  muscles), carpal flexors ( $N=2$  muscles), carpal extensors ( $N=3$  muscles), digital flexors ( $N=6$  muscles), and digital extensors ( $N=5$  muscles).

**Fig. 5. Estimated muscle  $F_{\max}$  as a function of resting fascicle length.** Values are means, with no error bars shown. Solid points represent proximal limb muscles and open circles represent distal muscles. Only muscles with relatively high force and or fascicle length are labeled, indicating these muscles are capable of appreciable work (force  $\times$  fiber length change) and power (work  $\div$  time). Abbreviations are the same as those in Figure 2.

**Fig. 6. Myosin heavy chain (MHC) isoform composition in groundhog forelimb muscles.** Mean percentage composition of MHC isoforms for the major functional muscle groups associated with scratch digging: limb retractors, elbow extensors and carpal/digital flexors.

**Table 1. Functional muscle groups of the digging apparatus of *M. monax***

| Muscle groups and Muscles studied                                                                                                     |
|---------------------------------------------------------------------------------------------------------------------------------------|
| <b>Extrinsic muscles:</b>                                                                                                             |
| <b>Scapula elevator/stabilizers</b>                                                                                                   |
| trapezius (parts: cervical, thoracic)                                                                                                 |
| rhomboideus (heads: capital, cervical, thoracic)                                                                                      |
| <b>Scapula/limb retractors</b>                                                                                                        |
| trapezius thoracica, rhomboideus thoracis, latissimus dorsi, <sup>a</sup> pectoralis superficialis, <sup>b</sup> pectoralis profundus |
| <b>Scapula/limb protractors</b>                                                                                                       |
| trapezius cervicalis, rhomboideus capitis, rhomboideus cervicis                                                                       |
| <b>Limb adductors</b>                                                                                                                 |
| pectoralis superficialis, pectoralis profundus                                                                                        |
| <b>Intrinsic muscles:</b>                                                                                                             |
| <b>Limb retractors (shoulder flexor/stabilizers)</b>                                                                                  |
| deltoideus (parts: scapular, acromial, clavicular)                                                                                    |
| teres major, teres minor, infraspinatus, triceps brachii-long head                                                                    |
| <b>Limb protractors (shoulder extensor/stabilizers)</b>                                                                               |
| coracobrachialis, supraspinatus, <sup>c</sup> subscapularis, cleidobrachialis                                                         |
| <b>Elbow flexors</b>                                                                                                                  |
| biceps brachii, brachialis, cleidobrachialis                                                                                          |
| <b>Elbow extensors</b>                                                                                                                |
| triceps brachii (heads: long, lateral, <sup>d</sup> medial/accessory), anconeus, <sup>e</sup> tensor fasciae antebrachii              |
| <b>Carpal flexors</b>                                                                                                                 |
| flexor carpi radialis, flexor carpi ulnaris                                                                                           |
| <b>Carpal extensors</b>                                                                                                               |
| extensor carpi radialis (heads: longus, brevis), extensor carpi ulnaris                                                               |
| <b>Digital flexors</b>                                                                                                                |
| flexor digitorum superficialis (heads: epicondylar, condylar)                                                                         |
| *flexor digitorum profundus (heads: humeral medial, humeral profundus, radial, ulnar)                                                 |
| <b>Digital extensors</b>                                                                                                              |
| extensor digitorum communis, extensor digitorum lateralis, <sup>f</sup> extensor digiti II, <sup>g</sup> extensor digiti III          |
| <sup>h</sup> abductor digiti I longus                                                                                                 |
| <b>Pronators</b>                                                                                                                      |
| pronator teres, pronator quadratus                                                                                                    |
| <b>Supinators</b>                                                                                                                     |
| supinator, <sup>i</sup> brachioradialis                                                                                               |

Muscle nomenclature follows Bezuidenhout and Evans (2005); a, consists of descending and transverse parts (measured as a single muscle); b, consists of cranial and caudal parts (measured as a single muscle); c, subscapularis may also adduct the humerus; d, measured as a single muscle; e, common name: *m. epitrochlearis*; f, common name: *m. extensor indicis*; g, only identified in one animal (data not included in analysis); h, common name: *m. abductor pollicis longus*; i, not indicated to be an elbow flexor

\*humeral profundus head not previously identified in *M. monax*.

**Table 2. Architectural properties data for groundhog forelimb muscles**

| Muscle                    | Abbrev. | <i>N</i> | Muscle mass (g) | Belly length (cm) | Fascicle length (cm) | Pennation angle (°) | Volume (cm <sup>3</sup> ) | PCSA (cm <sup>2</sup> ) | <i>F</i> <sub>max</sub> (N) | Power (W) | Fiber architecture |
|---------------------------|---------|----------|-----------------|-------------------|----------------------|---------------------|---------------------------|-------------------------|-----------------------------|-----------|--------------------|
| Trapezius pars cervicalis | TC      | 7        | 10.7±4.5        | 7.4±1.2           | 6.3±1.4              | 0                   | 10.1                      | 1.6                     | 48.2                        | 2.4       | parallel           |
| Trapezius pars thoracica  | TT      | 8        | 4.9±1.2         | 8.5±1.7           | 6.3±1.5              | 0                   | 4.6                       | 0.7                     | 22.2                        | 1.1       | parallel           |
| Rhomboideus capitis       | RCP     | 6        | 5.4±2.4         | 6.8±1.1           | 6.8±1.1              | 0                   | 5.1                       | 0.7                     | 22.4                        | 1.2       | parallel           |
| Rhomboideus cervicis      | RCR     | 6        | 3.5±1.1         | 5.1±1.4           | 4.6±1.5              | 0                   | 3.3                       | 0.7                     | 21.5                        | 0.8       | parallel           |
| Rhomboideus thoracis      | RT      | 7        | 2.0±0.6         | 3.4±0.6           | 3.1±0.7              | 0                   | 1.9                       | 0.6                     | 18.5                        | 0.5       | parallel           |
| Latissimus dorsi          | LAT     | 8        | 18.2±3.3        | 15.1±2.4          | 13.7±2.0             | 0                   | 17.1                      | 1.4                     | 40.5                        | 4.0       | parallel           |
| Pectoralis superficialis  | PS      | 8        | 16.7±2.9        | 7.0±1.0           | 5.9±1.3              | 0                   | 15.8                      | 2.7                     | 80.3                        | 3.7       | parallel           |
| Pectoralis profundus      | PP      | 8        | 5.9±2.1         | 11.6±2.5          | 10.3±2.7             | 0                   | 5.6                       | 0.5                     | 16.2                        | 1.3       | parallel           |
| Deltoideus scapularis     | DS      | 8        | 2.3±0.4         | 4.5±0.7           | 2.1±0.5              | 27±5                | 2.2                       | 1.0                     | 28.6                        | 0.5       | unipennate         |
| Deltoideus acromialis     | DA      | 8        | 1.6±0.3         | 3.4±0.2           | 2.3±0.5              | 0                   | 1.5                       | 0.7                     | 20.4                        | 0.4       | parallel           |
| Deltoideus clavicularis   | DC      | 8        | 2.1±0.8         | 4.0±0.9           | 3.4±0.7              | 0                   | 2.0                       | 0.6                     | 17.6                        | 0.5       | parallel           |
| Teres major               | TMJ     | 8        | 3.8±0.8         | 6.2±0.7           | 2.9±0.7              | 26±4                | 3.5                       | 1.1                     | 32.7                        | 0.8       | unipennate         |
| Teres minor               | TMN     | 7        | 1.5±1.0         | 5.6±0.7           | 1.9±1.2              | 26±4                | 1.4                       | 0.7                     | 20.1                        | 0.3       | unipennate         |
| Infraspinatus             | ISP     | 8        | 3.9±1.0         | 5.5±0.7           | 1.4±0.4              | 30±6                | 3.7                       | 2.3                     | 68.9                        | 0.8       | unipennate         |
| Supraspinatus             | SSP     | 8        | 7.7±1.6         | 5.5±0.7           | 2.3±0.4              | 29±5                | 7.2                       | 2.8                     | 83.3                        | 1.5       | bipennate          |
| Subscapularis             | SUB     | 8        | 7.5±1.9         | 4.9±0.5           | 1.5±0.5              | 30±7                | 7.1                       | 4.1                     | 123.6                       | 1.5       | multipennate       |
| Coracobrachialis          | CCB     | 8        | 1.3±0.5         | 5.0±0.4           | 1.5±0.6              | 28±4                | 1.2                       | 0.7                     | 21.3                        | 0.3       | unipennate         |
| Cleidobrachialis          | CB      | 8        | 3.4±1.1         | 6.6±0.8           | 5.4±0.7              | 0                   | 3.2                       | 0.6                     | 17.9                        | 0.8       | parallel           |
| Biceps brachii            | BB      | 8        | 2.9±0.4         | 5.0±0.5           | 2.2±0.6              | 25±3                | 2.7                       | 1.1                     | 33.8                        | 0.6       | unipennate         |
| Brachialis                | BCH     | 8        | 1.6±0.7         | 4.9±0.8           | 1.9±0.8              | 25±4                | 1.5                       | 0.7                     | 21.3                        | 0.3       | unipennate         |
| Triceps brachii – long    | TBLO    | 8        | 13.6±1.7        | 6.7±0.4           | 2.3±0.4              | 30±6                | 12.9                      | 4.7                     | 141.8                       | 2.6       | unipennate         |
| Triceps brachii – lateral | TBLA    | 8        | 8.3±1.6         | 5.7±0.5           | 4.4±0.6              | 0                   | 7.8                       | 1.8                     | 53.9                        | 1.8       | parallel           |

|                                                 |       |   |          |         |         |      |     |     |      |      |            |
|-------------------------------------------------|-------|---|----------|---------|---------|------|-----|-----|------|------|------------|
| Triceps brachii<br>– medial/accessory           | TBMA  | 8 | 4.1±1.0  | 5.6±0.4 | 4.0±0.7 | 0    | 3.8 | 0.9 | 28.4 | 0.9  | parallel   |
| Anconeus                                        | ANC   | 8 | 1.0±0.4  | 3.2±1.3 | 2.1±1.0 | 0    | 0.9 | 0.4 | 13.2 | 0.2  | parallel   |
| Tensor fasciae antebrachii                      | TFA   | 8 | 3.0±0.6  | 7.5±1.0 | 6.3±0.9 | 0    | 2.8 | 0.4 | 13.5 | 0.7  | parallel   |
| Brachioradialis                                 | BCR   | 8 | 2.4±0.5  | 7.0±0.5 | 6.0±0.6 | 0    | 2.2 | 0.4 | 11.2 | 0.5  | parallel   |
| Pronator teres                                  | PT    | 8 | 1.5±0.2  | 4.8±0.3 | 1.4±0.4 | 29±6 | 1.4 | 0.9 | 26.8 | 0.3  | unipennate |
| Flexor carpi radialis                           | FCR   | 8 | 1.0±0.2  | 5.0±0.5 | 1.5±0.3 | 24±4 | 0.9 | 0.6 | 16.7 | 0.2  | bipennate  |
| Flexor carpi ulnaris                            | FCU   | 8 | 1.0±0.2  | 5.2±0.3 | 1.8±0.6 | 25±5 | 0.9 | 0.5 | 14.1 | 0.2  | unipennate |
| Flexor digitorum<br>superficialis – epicondylar | FDSE  | 8 | 2.8±0.3  | 5.7±0.5 | 1.6±0.4 | 32±7 | 2.6 | 1.4 | 41.0 | 0.5  | bipennate  |
| Flexor digitorum<br>superficialis – condylar    | FDSC  | 8 | 3.0±0.5  | 6.0±0.4 | 1.2±0.3 | 29±7 | 2.8 | 2.0 | 60.7 | 0.6  | bipennate  |
| Flexor digitorum<br>profundus – medial          | FDPHM | 8 | 1.7±0.4  | 5.1±0.7 | 1.7±0.3 | 24±4 | 1.6 | 0.9 | 26.1 | 0.3  | bipennate  |
| Flexor digitorum<br>profundus – profundus       | FDPHP | 8 | 0.4±0.1  | 4.2±0.6 | 2.9±0.6 | 0    | 0.4 | 0.1 | 4.0  | 0.1  | parallel   |
| Flexor digitorum<br>profundus – radial          | FDPR  | 8 | 1.2±0.3  | 4.4±0.5 | 1.7±0.6 | 25±5 | 1.1 | 0.6 | 18.2 | 0.2  | unipennate |
| Flexor digitorum<br>profundus – ulnar           | FDFPU | 8 | 1.6±0.3  | 5.4±0.5 | 1.7±0.5 | 24±5 | 1.5 | 0.8 | 23.2 | 0.3  | unipennate |
| Extensor carpi radialis<br>– longus             | ECRL  | 8 | 1.4±0.4  | 5.6±0.6 | 3.3±1.1 | 23±3 | 1.3 | 0.4 | 10.9 | 0.3  | unipennate |
| Extensor carpi radialis<br>– brevis             | ECRB  | 8 | 1.4±0.2  | 5.4±0.5 | 4.2±0.6 | 0    | 1.3 | 0.3 | 9.3  | 0.3  | parallel   |
| Extensor carpi ulnaris                          | ECU   | 8 | 1.3±0.3  | 5.4±0.6 | 1.3±0.3 | 25±5 | 1.2 | 0.9 | 26.1 | 0.3  | bipennate  |
| Extensor digitorum<br>communis                  | EDC   | 8 | 1.2±0.2  | 6.1±0.4 | 1.4±0.3 | 29±5 | 1.1 | 0.7 | 20.4 | 0.2  | unipennate |
| Extensor digitorum<br>lateralis                 | EDL   | 8 | 0.7±0.1  | 5.6±0.4 | 1.3±0.3 | 24±5 | 0.6 | 0.4 | 13.1 | 0.1  | unipennate |
| Extensor digiti II                              | ED2   | 5 | 0.3±0.2  | 3.9±0.8 | 1.4±1.1 | 21±5 | 0.3 | 0.2 | 6.1  | 0.1  | unipennate |
| Abductor digiti I longus                        | ADL   | 7 | 0.9±0.3  | 4.6±0.8 | 1.2±0.4 | 22±4 | 0.9 | 0.7 | 20.2 | 0.2  | unipennate |
| Pronator quadratus                              | PQ    | 8 | 0.1±0.02 | 1.2±0.2 | 0.8±0.1 | 0    | 0.1 | 0.1 | 2.8  | 0.02 | parallel   |
| Supinator                                       | SUP   | 8 | 0.5±0.3  | 3.9±0.7 | 0.8±0.3 | 28±6 | 0.5 | 0.5 | 16.4 | 0.1  | unipennate |



**Table 3. Muscle moment arms ( $r_m$ ), joint torques, and architectural indices (AI) for groundhog forelimb muscles**

| Muscle                                         | Joint    | Mean $r_m$<br>(cm) | Joint Torque<br>(N.cm) | $l^F/r_m$ | $l^F/ML$ |
|------------------------------------------------|----------|--------------------|------------------------|-----------|----------|
| Latissimus dorsi                               | Shoulder | <b>1.8±0.5</b>     | 74.5                   | 6.90      | 0.84     |
| Pectoralis superficialis                       |          | <b>2.8±0.6</b>     | 223                    | 2.12      | 0.84     |
| Pectoralis profundus                           |          | <b>1.2±0.3</b>     | 18.7                   | 8.92      | 0.89     |
| Deltoides scapularis                           |          | <b>1.3±0.4</b>     | 37.6                   | 1.56      | 0.45     |
| Deltoides acromialis                           |          | <b>0.7±0.2</b>     | 14.6                   | 3.17      | 0.66     |
| Deltoides clavicularis                         |          | <b>1.5±0.4</b>     | 25.8                   | 2.32      | 0.86     |
| Teres major                                    |          | <b>1.6±0.3</b>     | 53.6                   | 1.79      | 0.47     |
| Teres minor                                    |          | <b>1.0±0.4</b>     | 19.9                   | 1.91      | 0.34     |
| Infraspinatus                                  |          | <b>1.0±0.3</b>     | 68.1                   | 1.41      | 0.25     |
| Supraspinatus                                  |          | <b>0.9±0.3</b>     | 79.1                   | 2.40      | 0.42     |
| Subscapularis                                  |          | <b>0.8±0.2</b>     | 93.6                   | 1.98      | 0.30     |
| Triceps brachii – long                         |          | <b>1.9±0.5</b>     | 263                    | 1.26      | 0.35     |
| Cleidobrachialis                               | Elbow    | <b>1.5±0.4</b>     | 26.6                   | 3.67      | 0.82     |
| Biceps brachii                                 |          | <b>1.2±0.3</b>     | 42.2                   | 1.76      | 0.44     |
| Brachialis                                     |          | <b>1.1±0.2</b>     | 22.5                   | 1.78      | 0.38     |
| Triceps brachii – long                         |          | <b>1.7±0.4</b>     | 236                    | 1.41      | 0.35     |
| Triceps brachii – lateral                      |          | <b>1.2±0.5</b>     | 67.3                   | 3.49      | 0.76     |
| Triceps brachii – medial/accessory             |          | <b>1.1±0.2</b>     | 32.1                   | 3.57      | 0.72     |
| Anconeus                                       |          | <b>0.8±0.3</b>     | 10.6                   | 2.63      | 0.65     |
| Tensor fasciae antebrachii                     |          | <b>1.3±0.3</b>     | 17.1                   | 4.94      | 0.84     |
| Flexor carpi radialis                          | Carpal   | <b>0.9±0.2</b>     | 14.5                   | 1.76      | 0.31     |
| Flexor carpi ulnaris                           |          | <b>0.8±0.1</b>     | 11.7                   | 2.12      | 0.34     |
| Flexor digitorum superficialis – epicondylar   |          | <b>1.1±0.3</b>     | 45.9                   | 1.46      | 0.28     |
| Flexor digitorum superficialis – condylar      |          | <b>0.7±0.2</b>     | 42.8                   | 1.71      | 0.20     |
| Flexor digitorum profundus – humeral medial    |          | <b>0.5±0.2</b>     | 14.1                   | 3.05      | 0.33     |
| Flexor digitorum profundus – humeral profundus |          | <b>0.7±0.3</b>     | 2.6                    | 4.35      | 0.69     |
| Flexor digitorum profundus – radial            |          | <b>0.5±0.1</b>     | 9.7                    | 3.16      | 0.38     |
| Flexor digitorum profundus – ulnar             |          | <b>0.6±0.1</b>     | 14.6                   | 2.75      | 0.32     |

In bold are mean ± s.d.

 $l^F$  is mean fascicle length $r_m$  is mean moment arm

ML is muscle belly length

 $l^F/r_m$  ratios >2.0 indicate a high ability of the muscle to move a joint through a large range of motion $l^F/ML$  ratios >0.5 indicate a high ability of the muscle to shorten and contract at appreciable velocity

**Table 4. Mean percentage MHC isoform composition in selected groundhog forelimb muscles**

| Muscle                                          | <i>N</i> | Myosin Heavy Chain Isoform (%) |           |          |
|-------------------------------------------------|----------|--------------------------------|-----------|----------|
|                                                 |          | MHC-1                          | MHC-2A    | MHC-2X   |
| Latissimus dorsi                                | 4        | 19.1±7.4                       | 65.5±4.6  | 15.4±5.1 |
| Pectoralis superficialis                        | 4        | 18.3±4.2                       | 62.6±6.4  | 19.1±4.3 |
| Deltoideus acromialis                           | 4        | 20.3±11.8                      | 79.7±11.9 | 0.0      |
| Teres major                                     | 4        | 13.9±4.9                       | 63.2±5.4  | 22.9±6.0 |
| Biceps brachii                                  | 4        | 9.7±5.6                        | 69.7±5.1  | 20.6±3.3 |
| Triceps brachii long                            | 4        | 9.9±6.6                        | 67.5±6.1  | 22.6±3.3 |
| Triceps brachii lateral                         | 4        | 8.5±2.1                        | 72.7±5.2  | 18.8±3.4 |
| Flexor carpi ulnaris                            | 4        | 28.2±4.9                       | 71.8±4.9  | 0.0      |
| Flexor digitorum superficialis<br>– epicondylar | 4        | 35.1±4.6                       | 64.9±4.6  | 0.0      |
| Flexor digitorum profundus<br>– humeral medial  | 4        | 21.1±5.0                       | 78.9±5.0  | 0.0      |

All data are mean ± s.d.

Means for each muscle were computed from 3 independent gel experiments per individual.

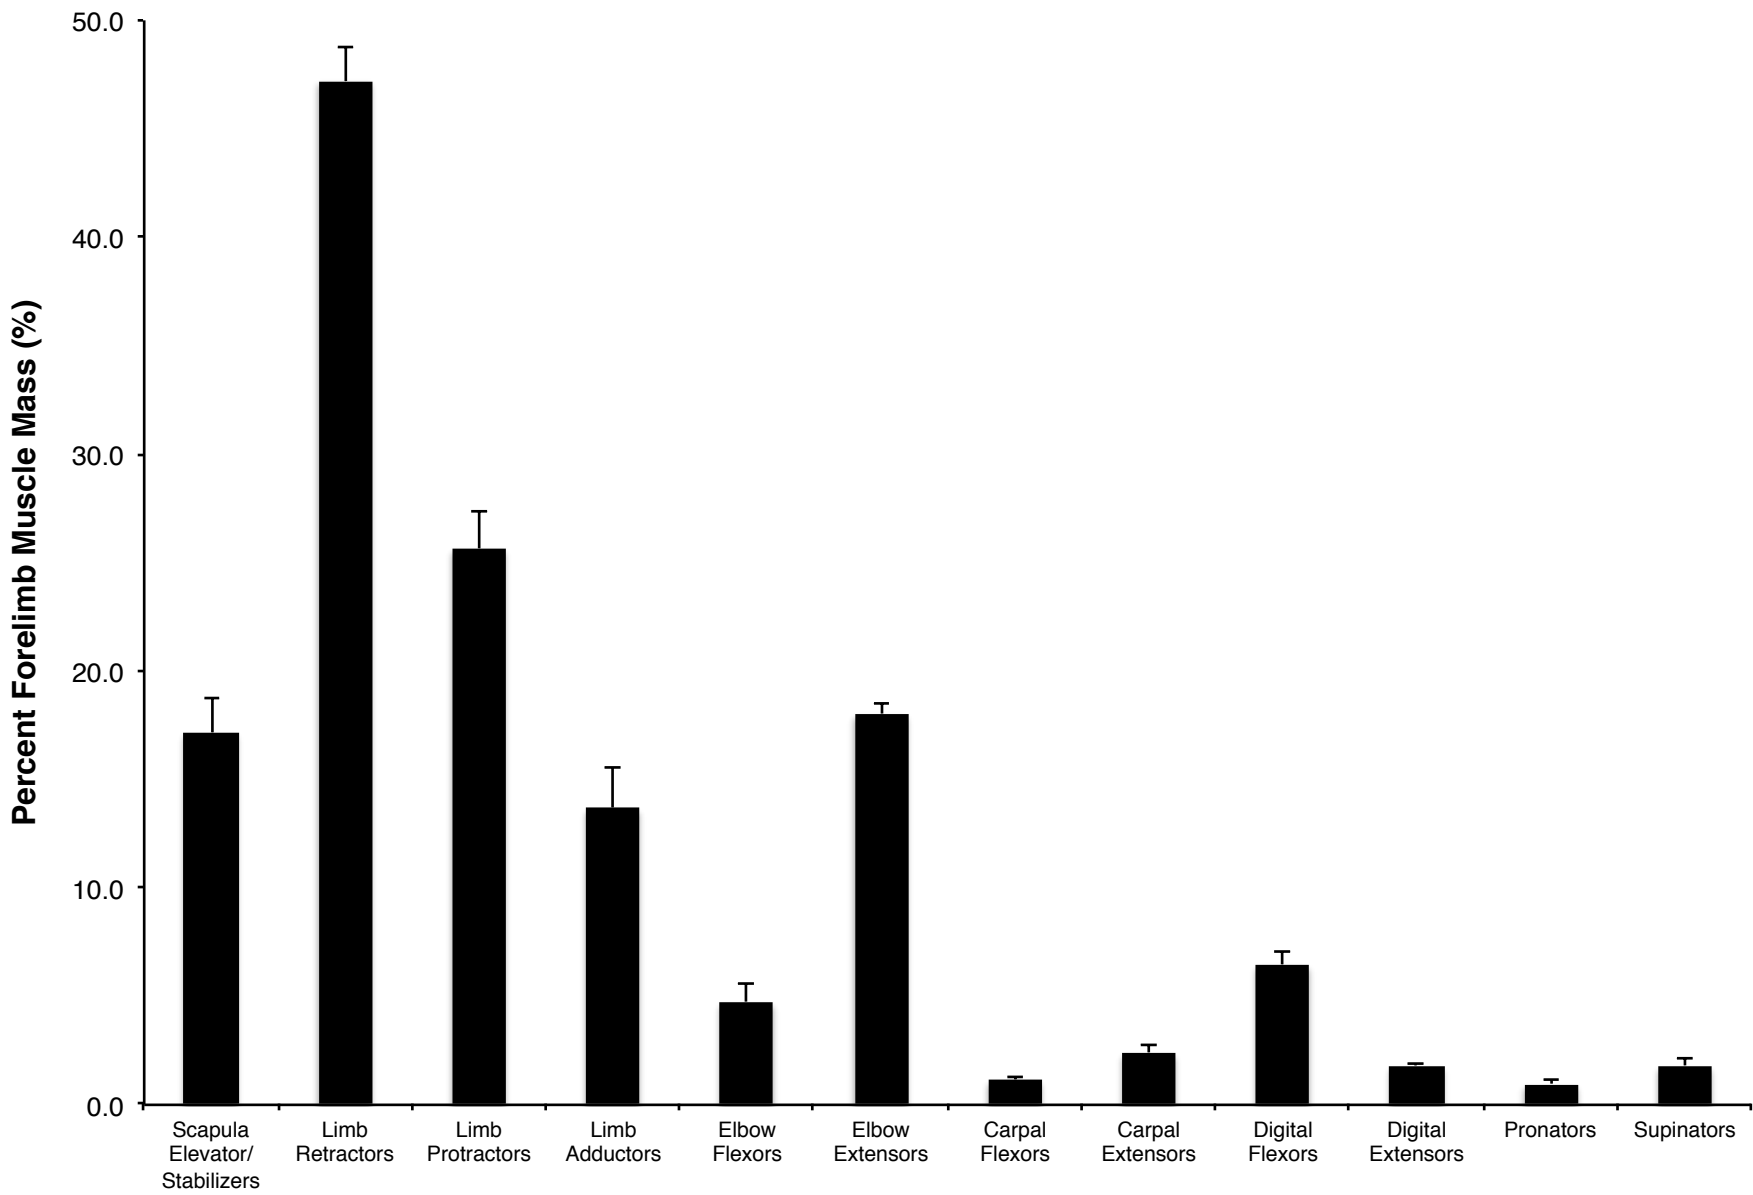

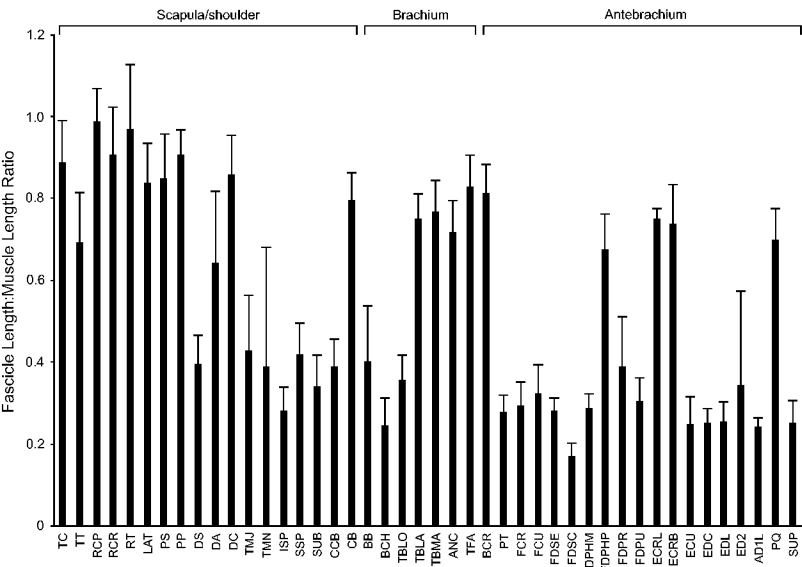

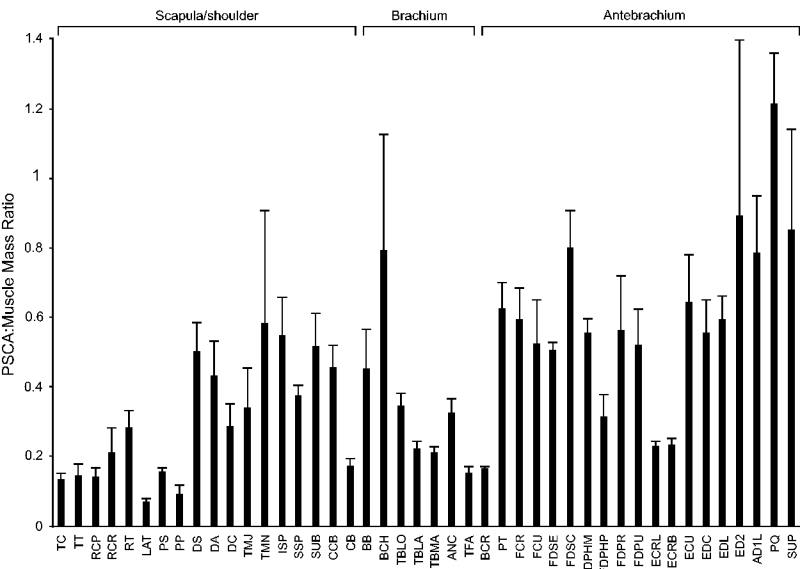

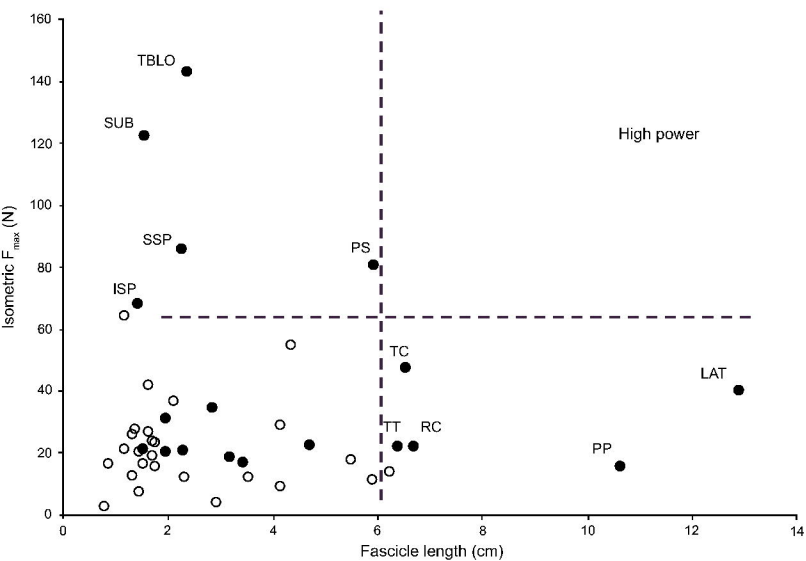

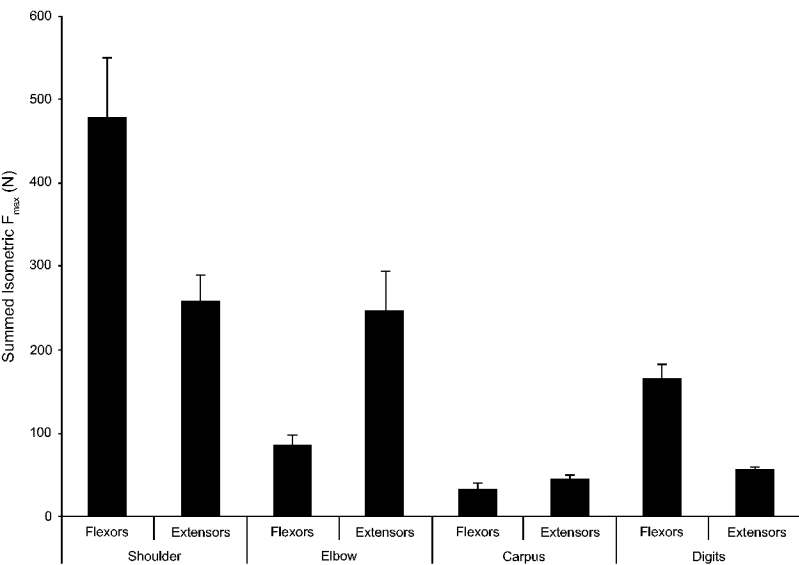



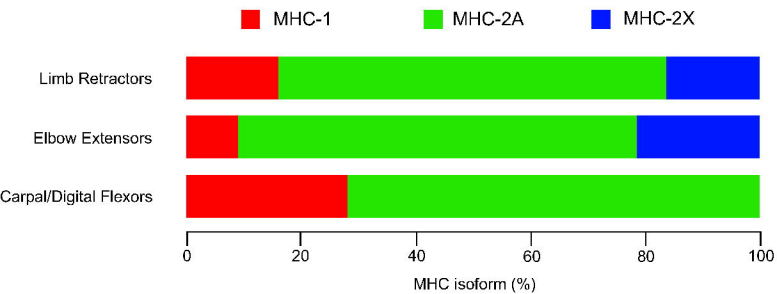

Source: https://cob.silverchair.com/jeb/article-pdf/doi/10.1242/jeb.107128/2038103/jeb_107128.pdf
